# Supplementary material
Source: PubMed Central journal article supplement (PMC7513349)
Supplement: ao0c03270_si_001.pdf [file ao0c03270_si_001.pdf]

Supporting information

**Targeted isolation of cytotoxic sesquiterpene lactones from  
*Eupatorium fortunei* by the NMR annotation tool, SMART 2.0**

Jiho Lee, Jinyoung Park, Ju Yeol Kim, Birang Jeong, Seong Yeon Choi, Hyeon Seok Jang, Heejung Yang\*

Laboratory of Natural Products Chemistry, College of Pharmacy, Kangwon National University, Chuncheon 24341,  
Republic of Korea

Supporting Information Contents:

**Figure S1.** Extracts and sub-fractions of cytotoxic activity against five cell lines

**Figure S2.** The HSQC spectrum of E2 and E3

**Figure S3.** The HSQC spectrum and sunburst plot of E1

**Figure S4.** The HSQC spectrum of E2-4 , E2-5, E2-6 and E2-7

**Figure S5.** The structures of compounds predicted for sub-fraction E2-4 using SMART 2.0

**Figure S6.** The structures of compounds predicted for sub-fraction E2-5 using SMART 2.0

**Figure S7.** The structures of compounds predicted for sub-fraction E2-7 using SMART 2.0

**Figure S8.** The  $^1\text{H}$  NMR spectrum of **1** ( $\text{CD}_3\text{OD}$ , 600 MHz)

**Figure S9.** The  $^{13}\text{C}$  NMR spectrum of **1** ( $\text{CD}_3\text{OD}$ , 150 MHz)

**Figure S10.** The HSQC spectrum of **1** ( $\text{CD}_3\text{OD}$ )

**Figure S11.** The  $^1\text{H}$ - $^1\text{H}$  COSY spectrum of **1** ( $\text{CD}_3\text{OD}$ )

**Figure S12.** The HMBC spectrum of **1** ( $\text{CD}_3\text{OD}$ )

**Figure S13.** The ROESY spectrum of **1** ( $\text{CD}_3\text{OD}$ )

**Table S1.** Compounds from sub-fraction E2-4 predicted by SMART 2.0

**Table S2.** Compounds from sub-fraction E2-5 predicted by SMART 2.0

**Table S3.** Compounds from sub-fraction E2-7 predicted by SMART 2.0

**Table S4.** Sesquiterpene lactones from sub-fraction E2-6 predicted by SMART 2.0

**Figure S1.** Extracts and sub-fractions of cytotoxic activity against five cell lines

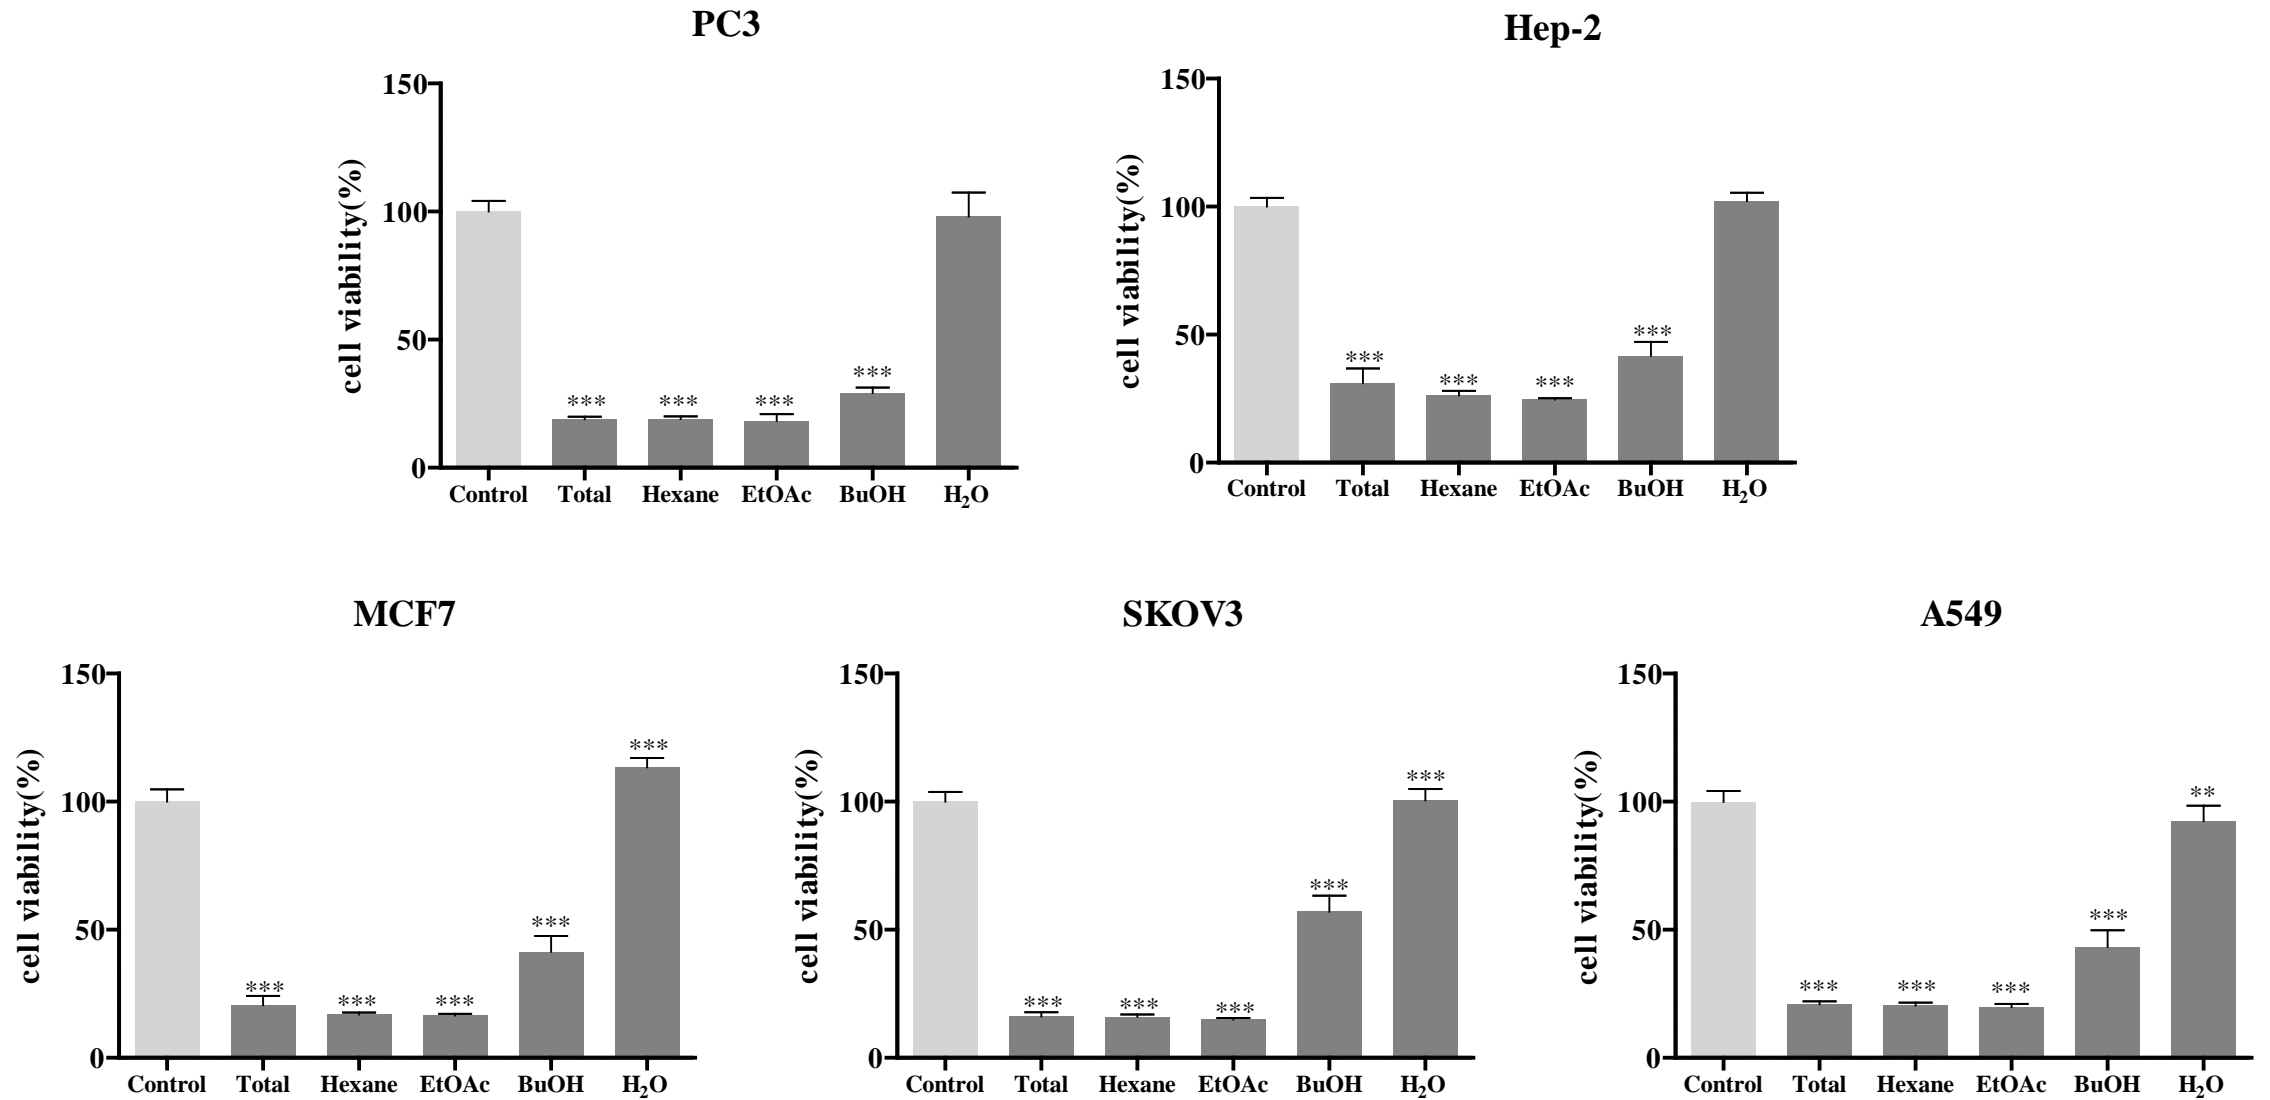

**Figure S2.** The HSQC spectrum of E2 and E3

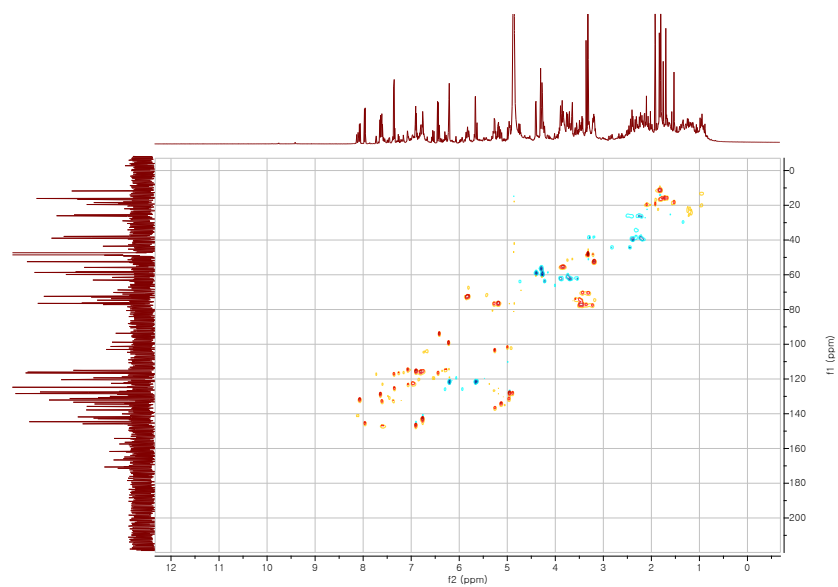

**E2**

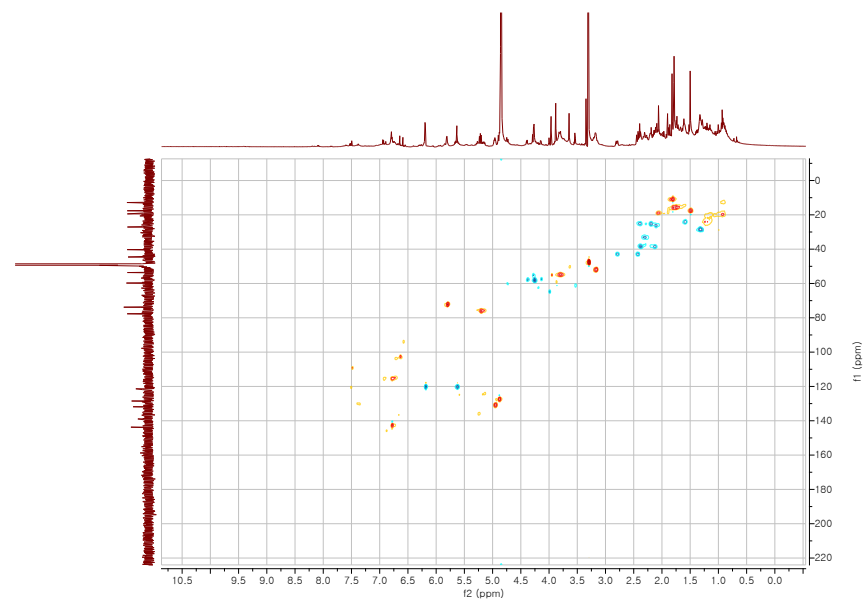

**E3**

**Figure S3.** The HSQC spectrum and sunburst plot of E1

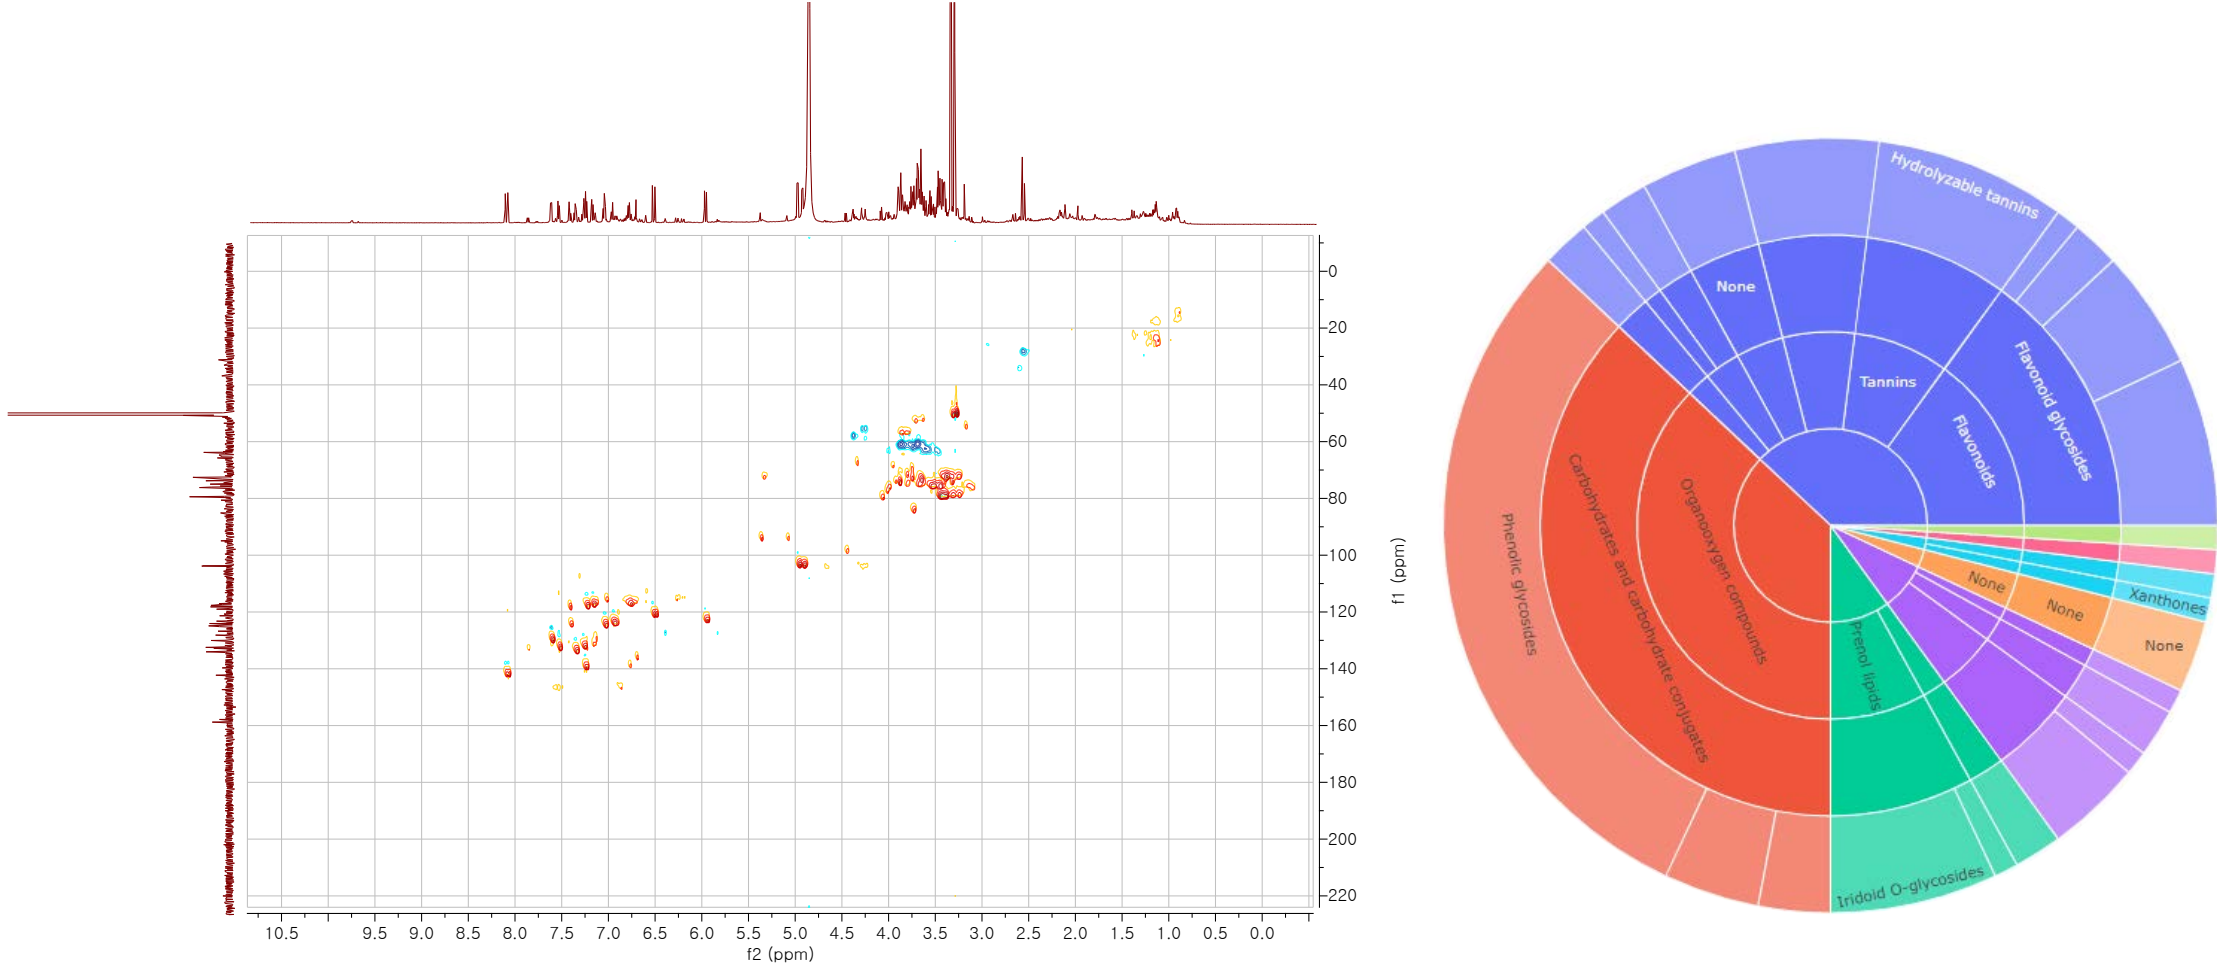

**Figure S4.** The HSQC spectrum of E2-4 , E2-5, E2-6 and E2-7

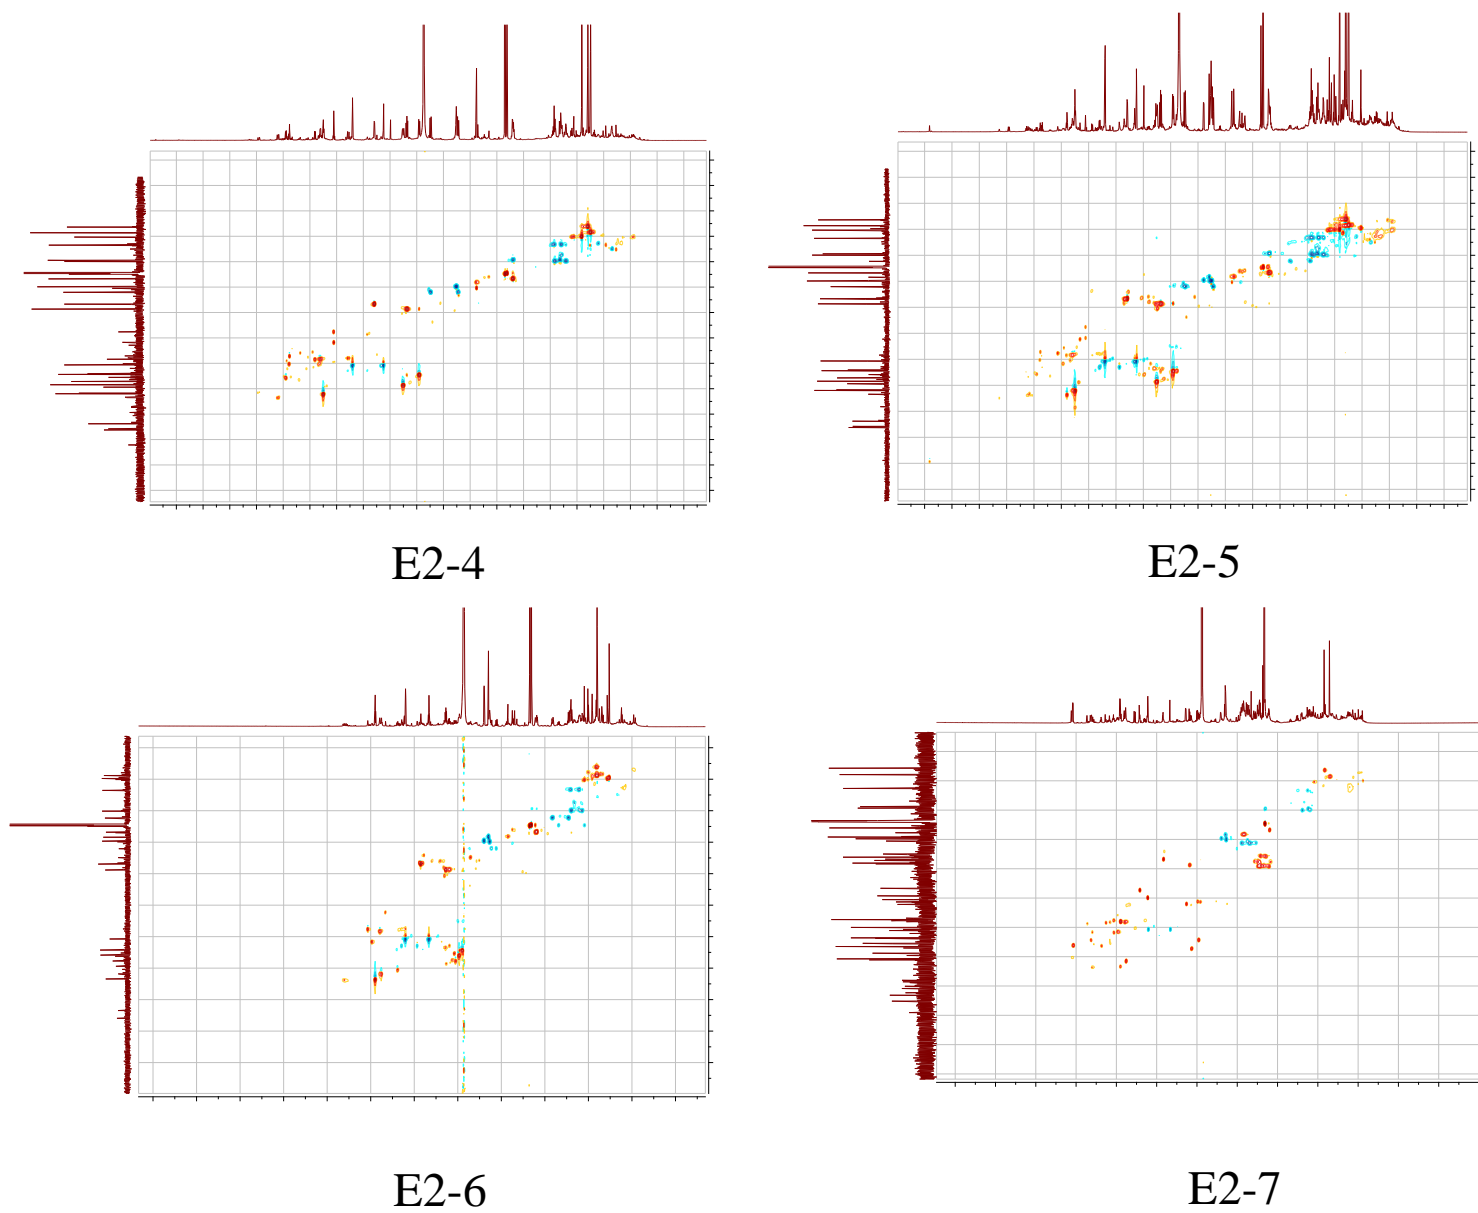

**Figure S5.** The structures of compounds predicted for sub-fraction E2-4 using SMART 2.0

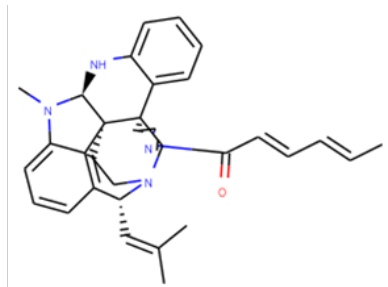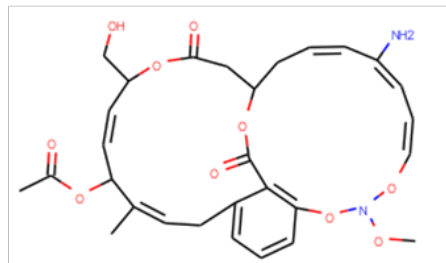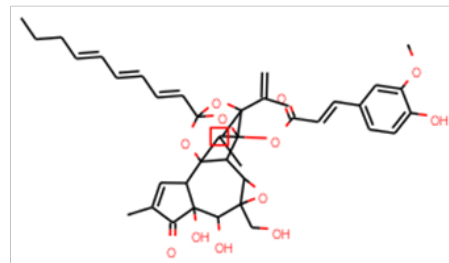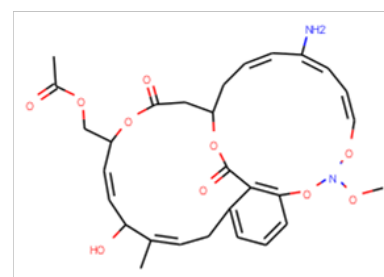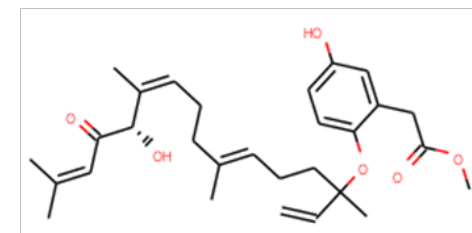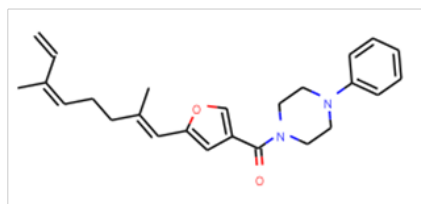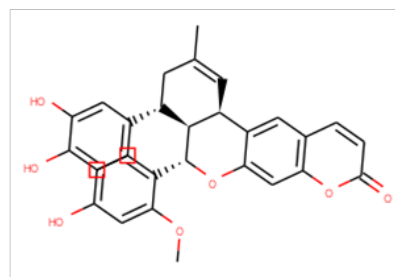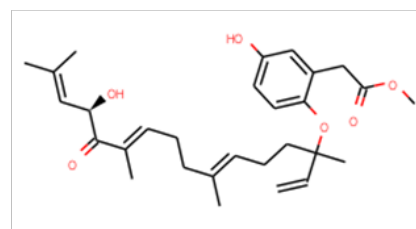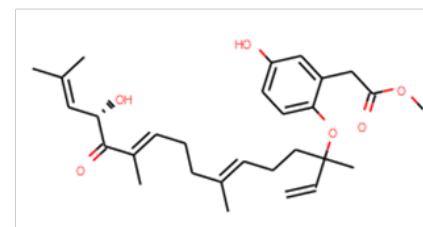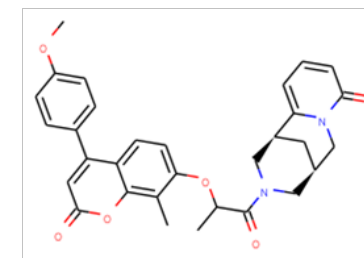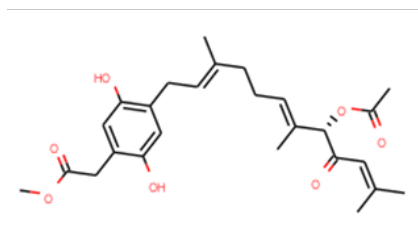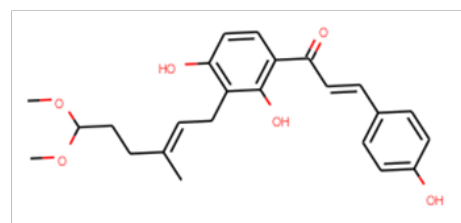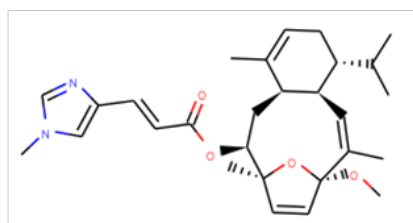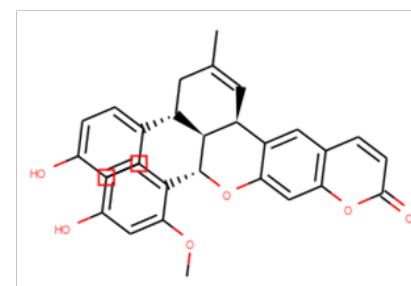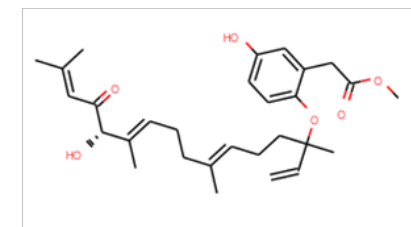



**Figure S6.** The structures of compounds predicted for sub-fraction E2-5 using SMART 2.0

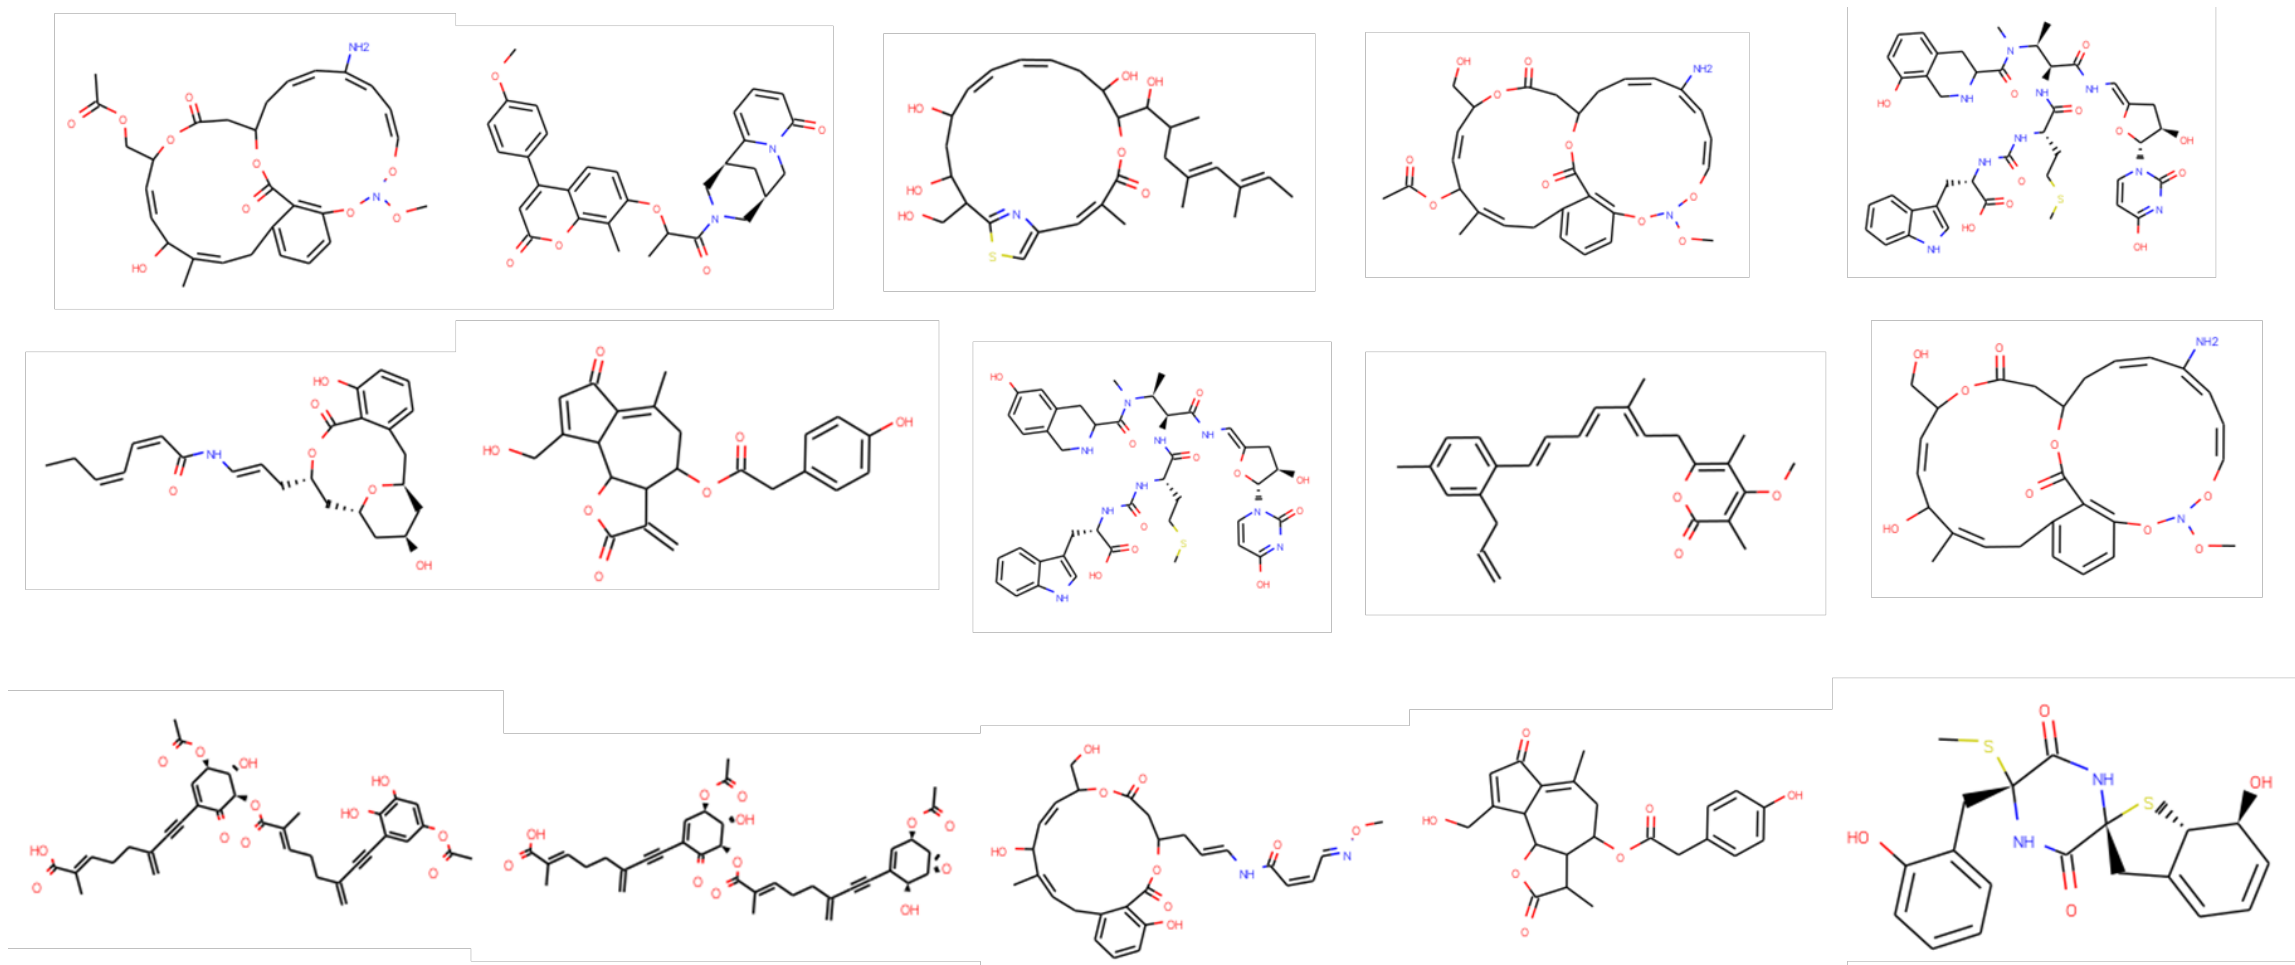

**Figure S7.** The structures of compounds predicted for sub-fraction E2-7 using SMART 2.0

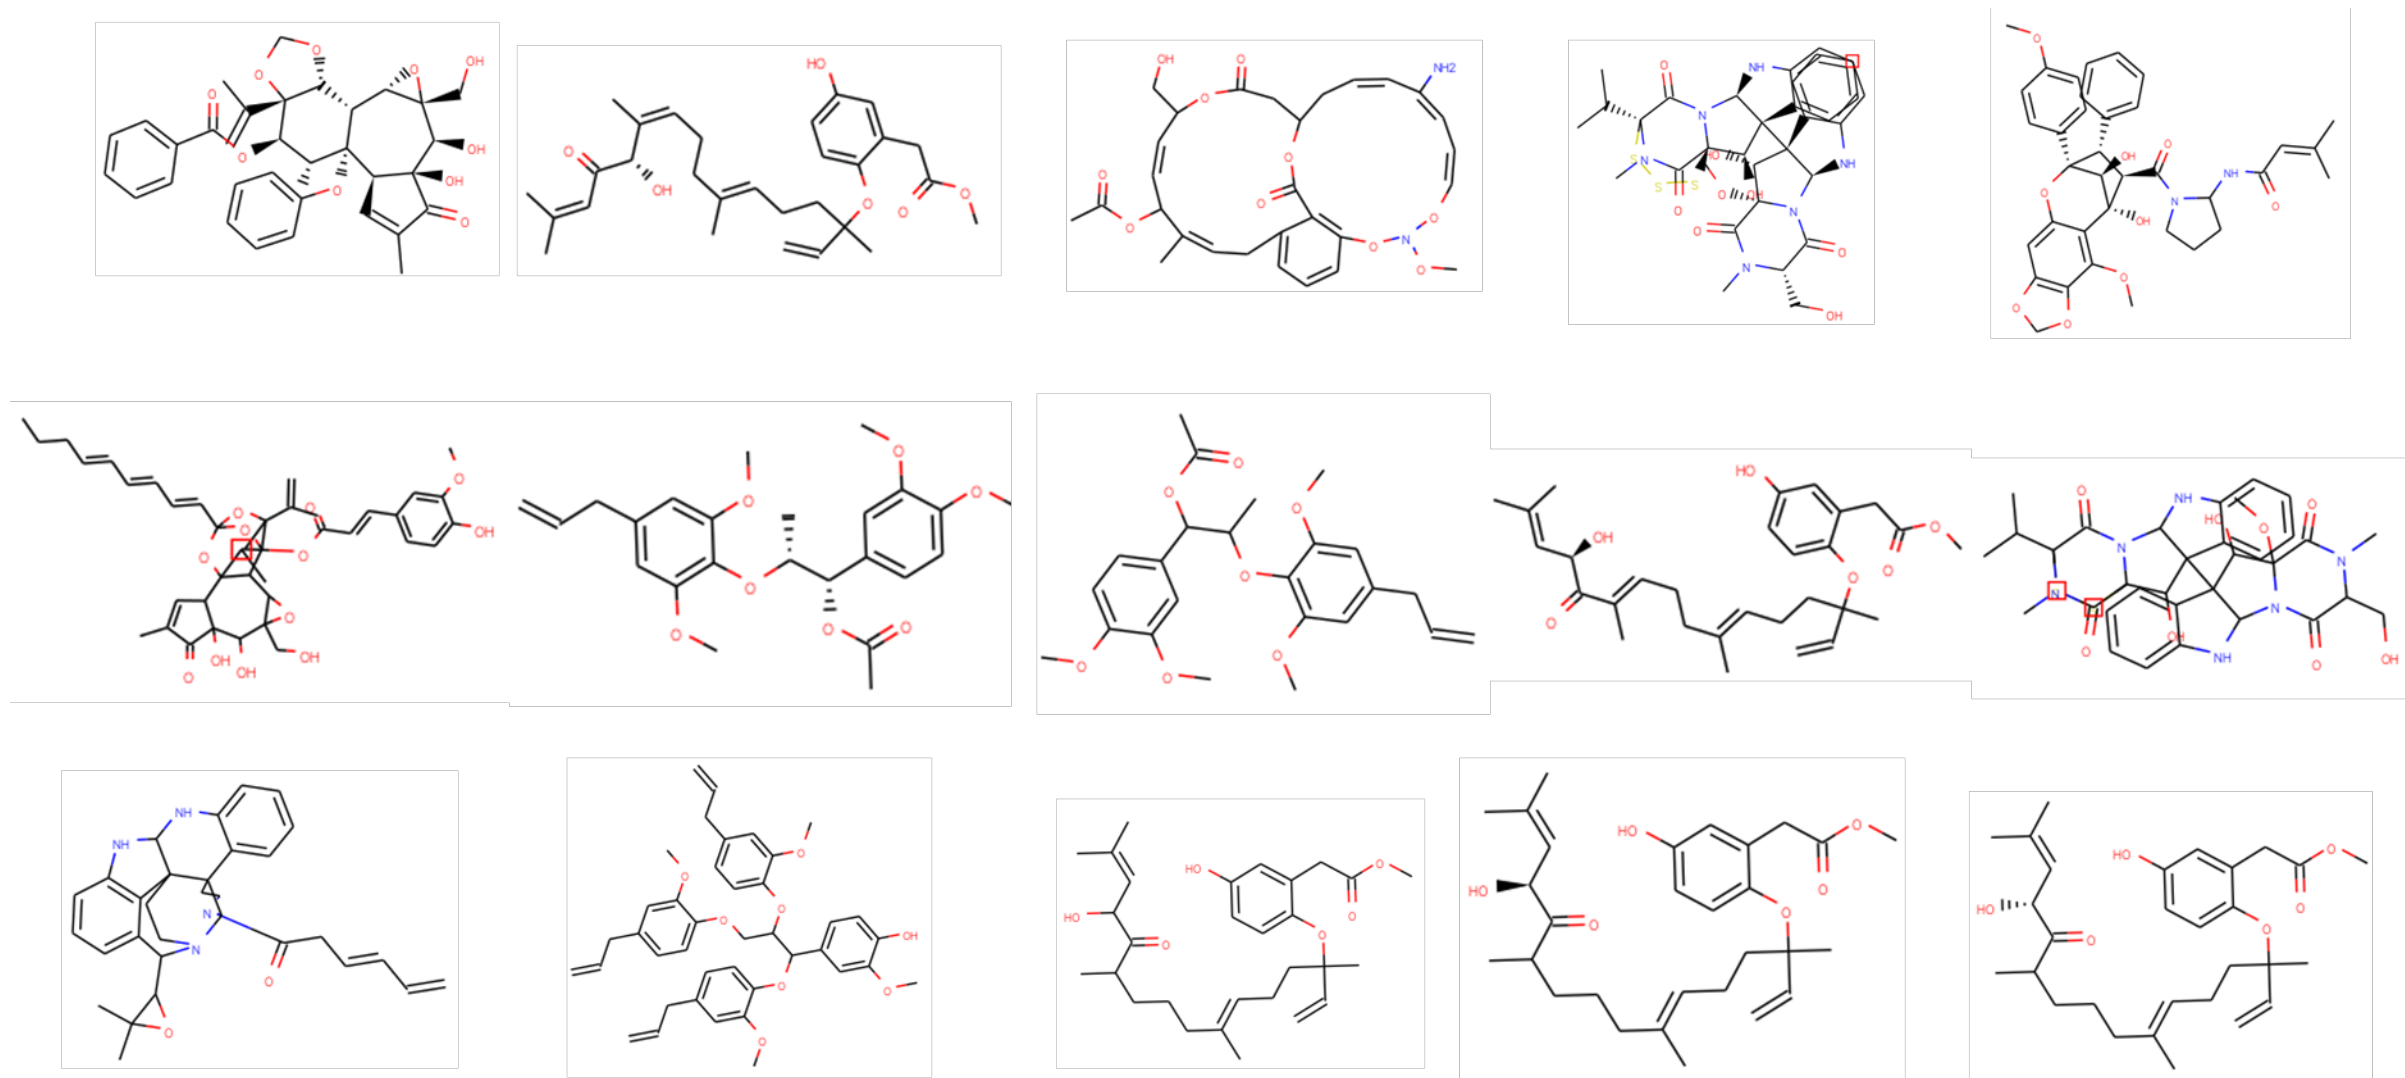

**Figure S8.** The  $^1\text{H}$  NMR spectrum of **1** ( $\text{CD}_3\text{OD}$ , 600 MHz)

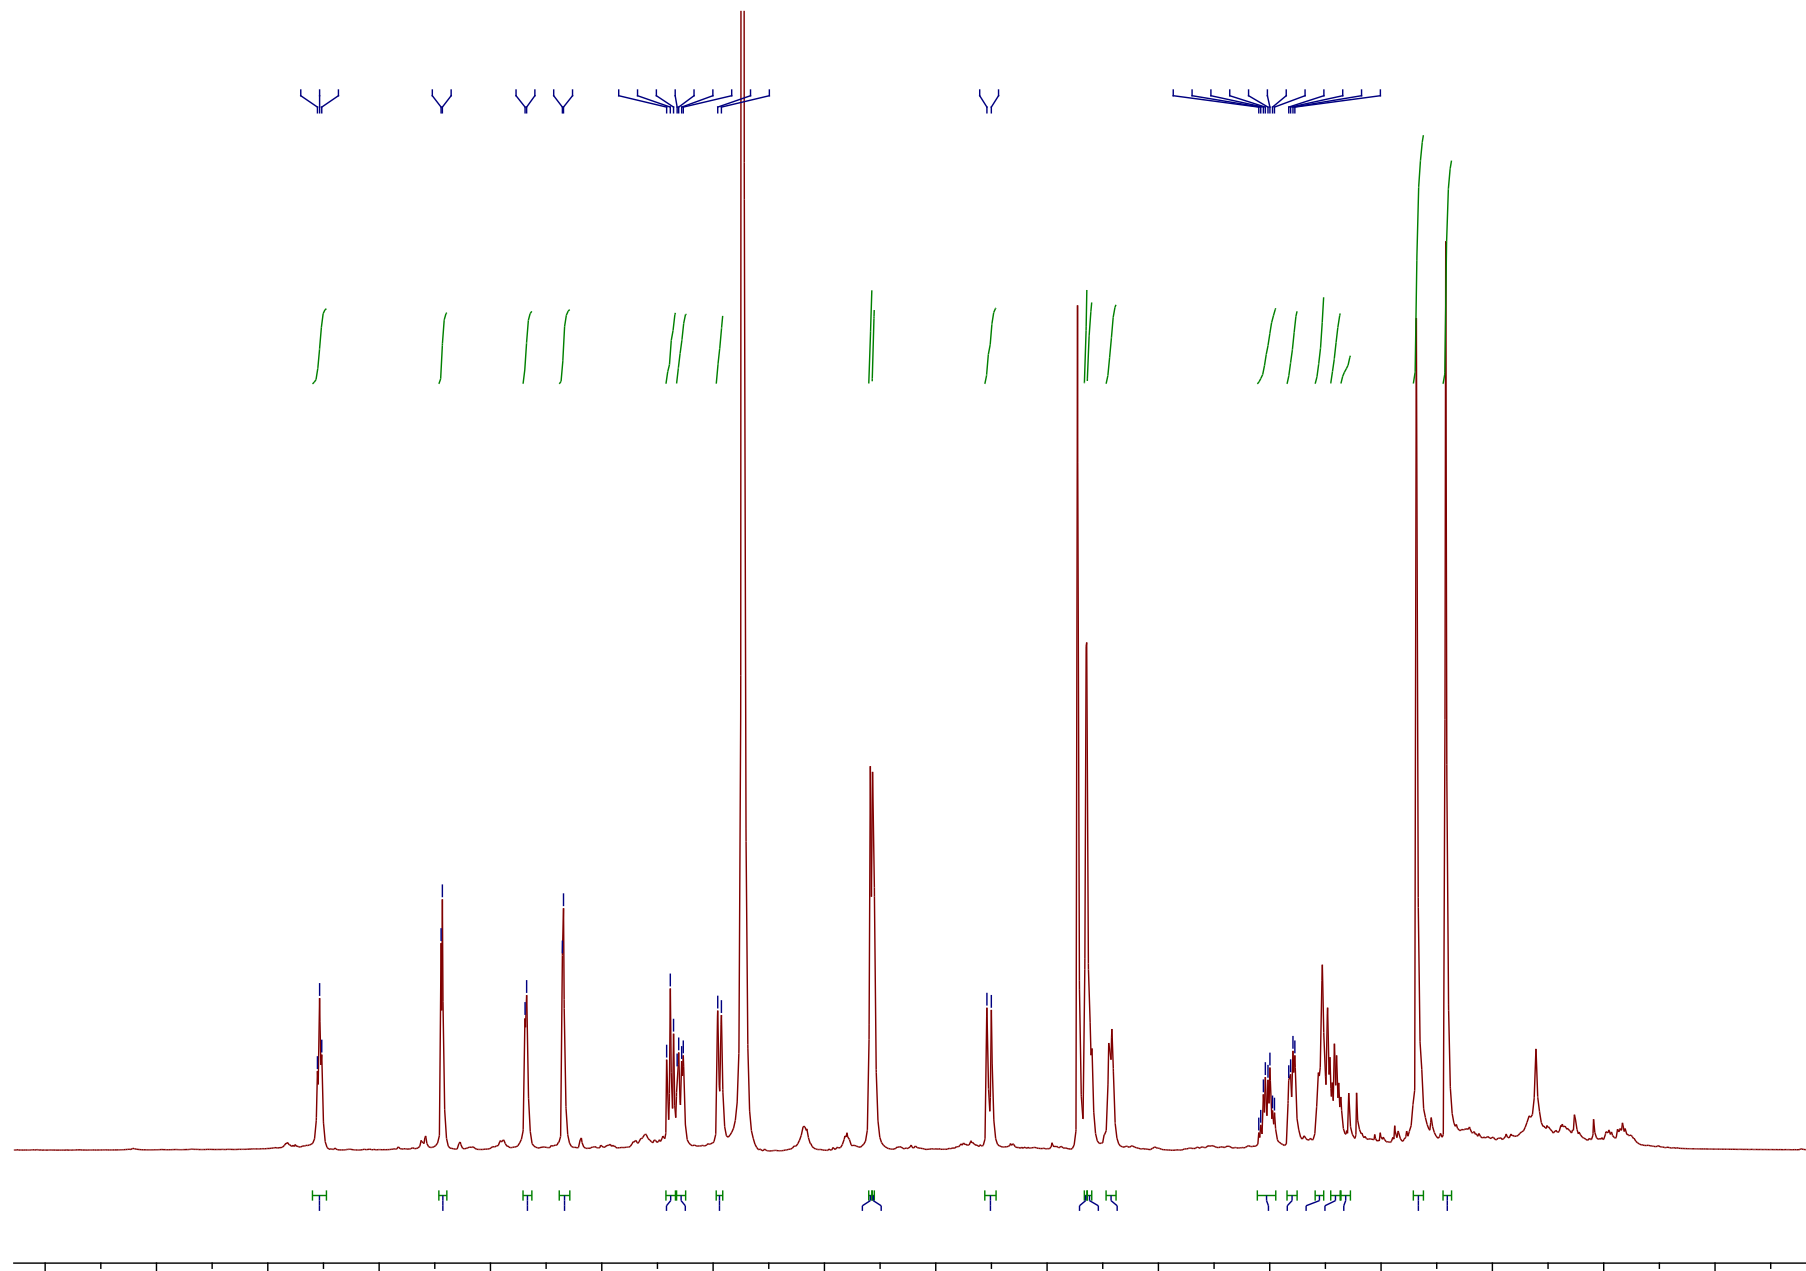

**Figure S9.** The  $^{13}\text{C}$  NMR spectrum of **1** ( $\text{CD}_3\text{OD}$ , 150 MHz)

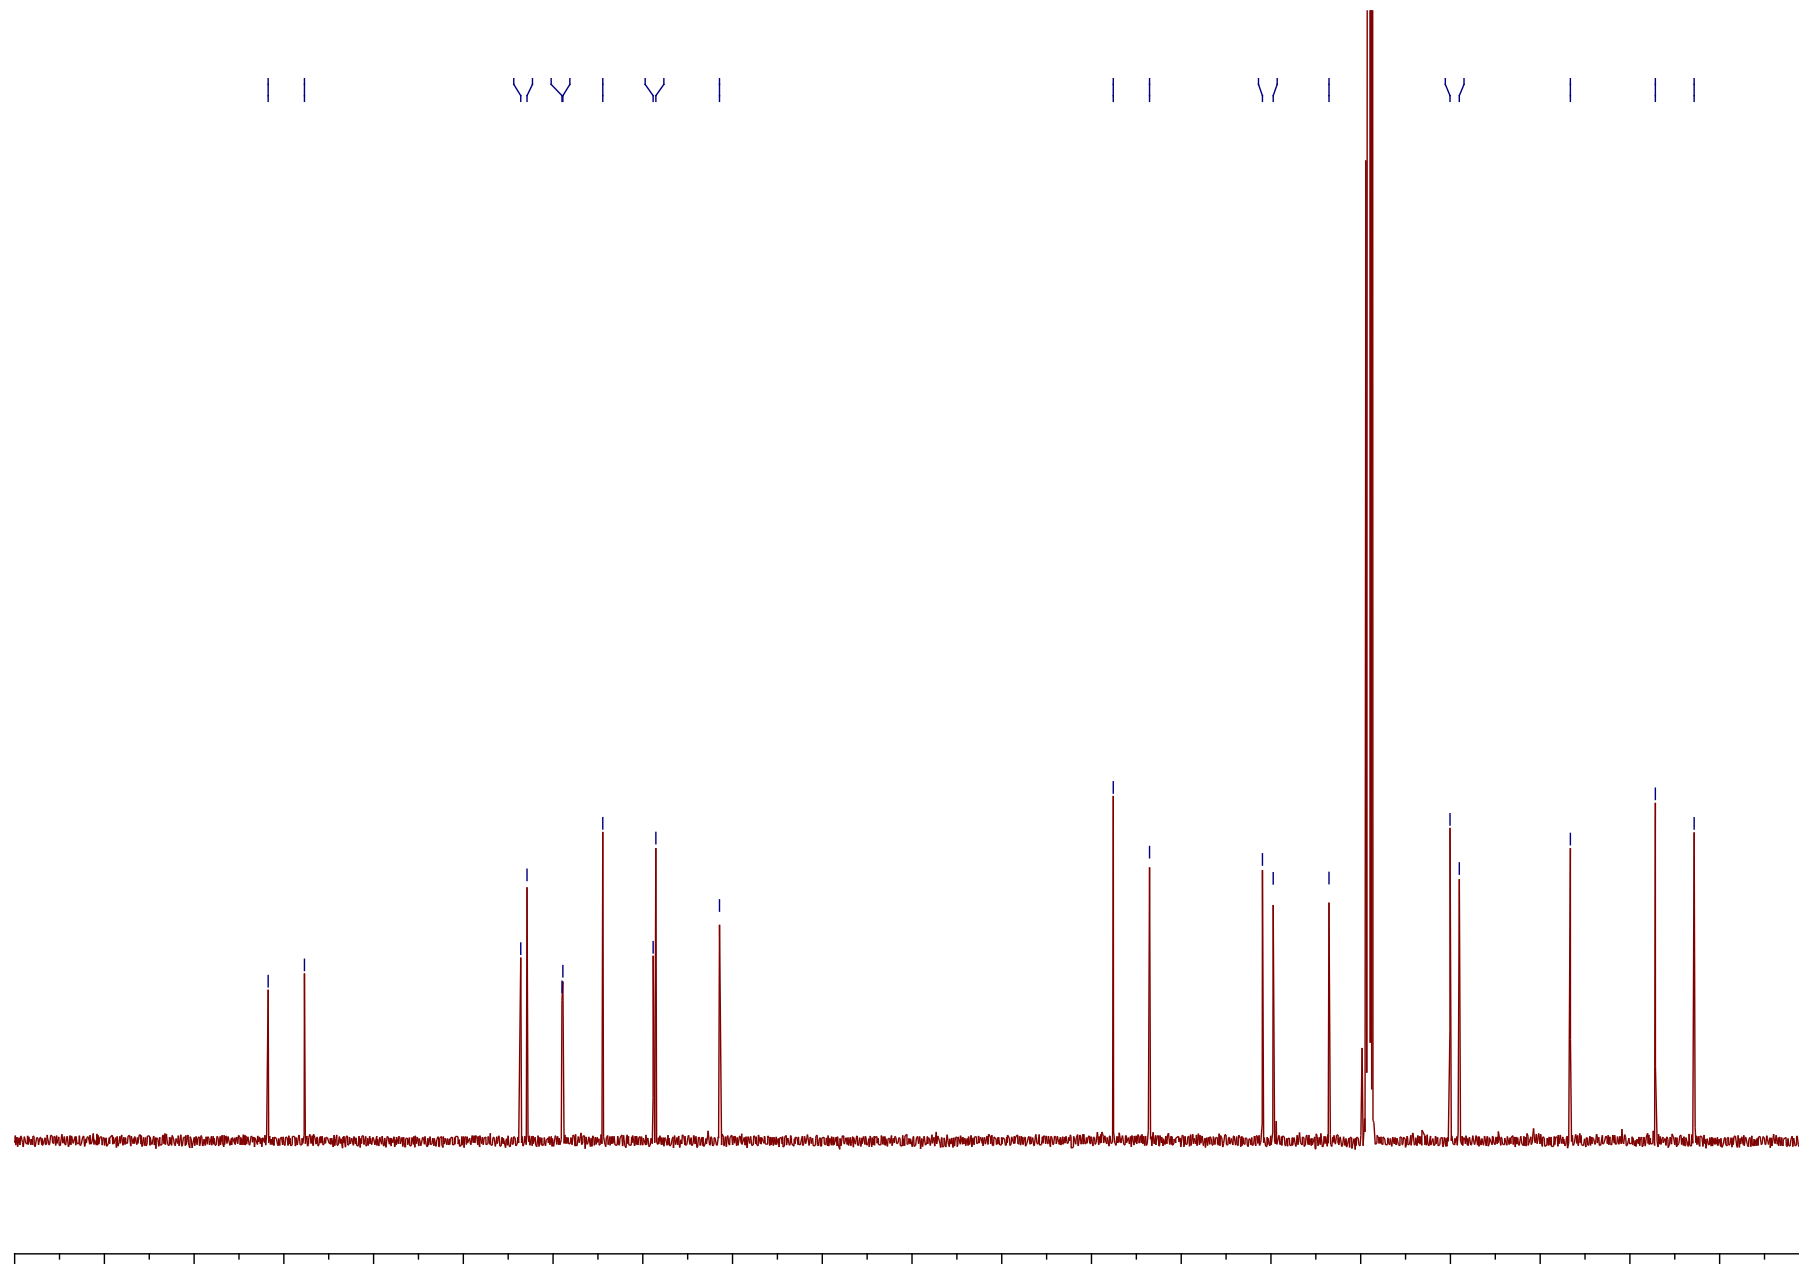

**Figure S10.** The HSQC spectrum of **1** (CD<sub>3</sub>OD)

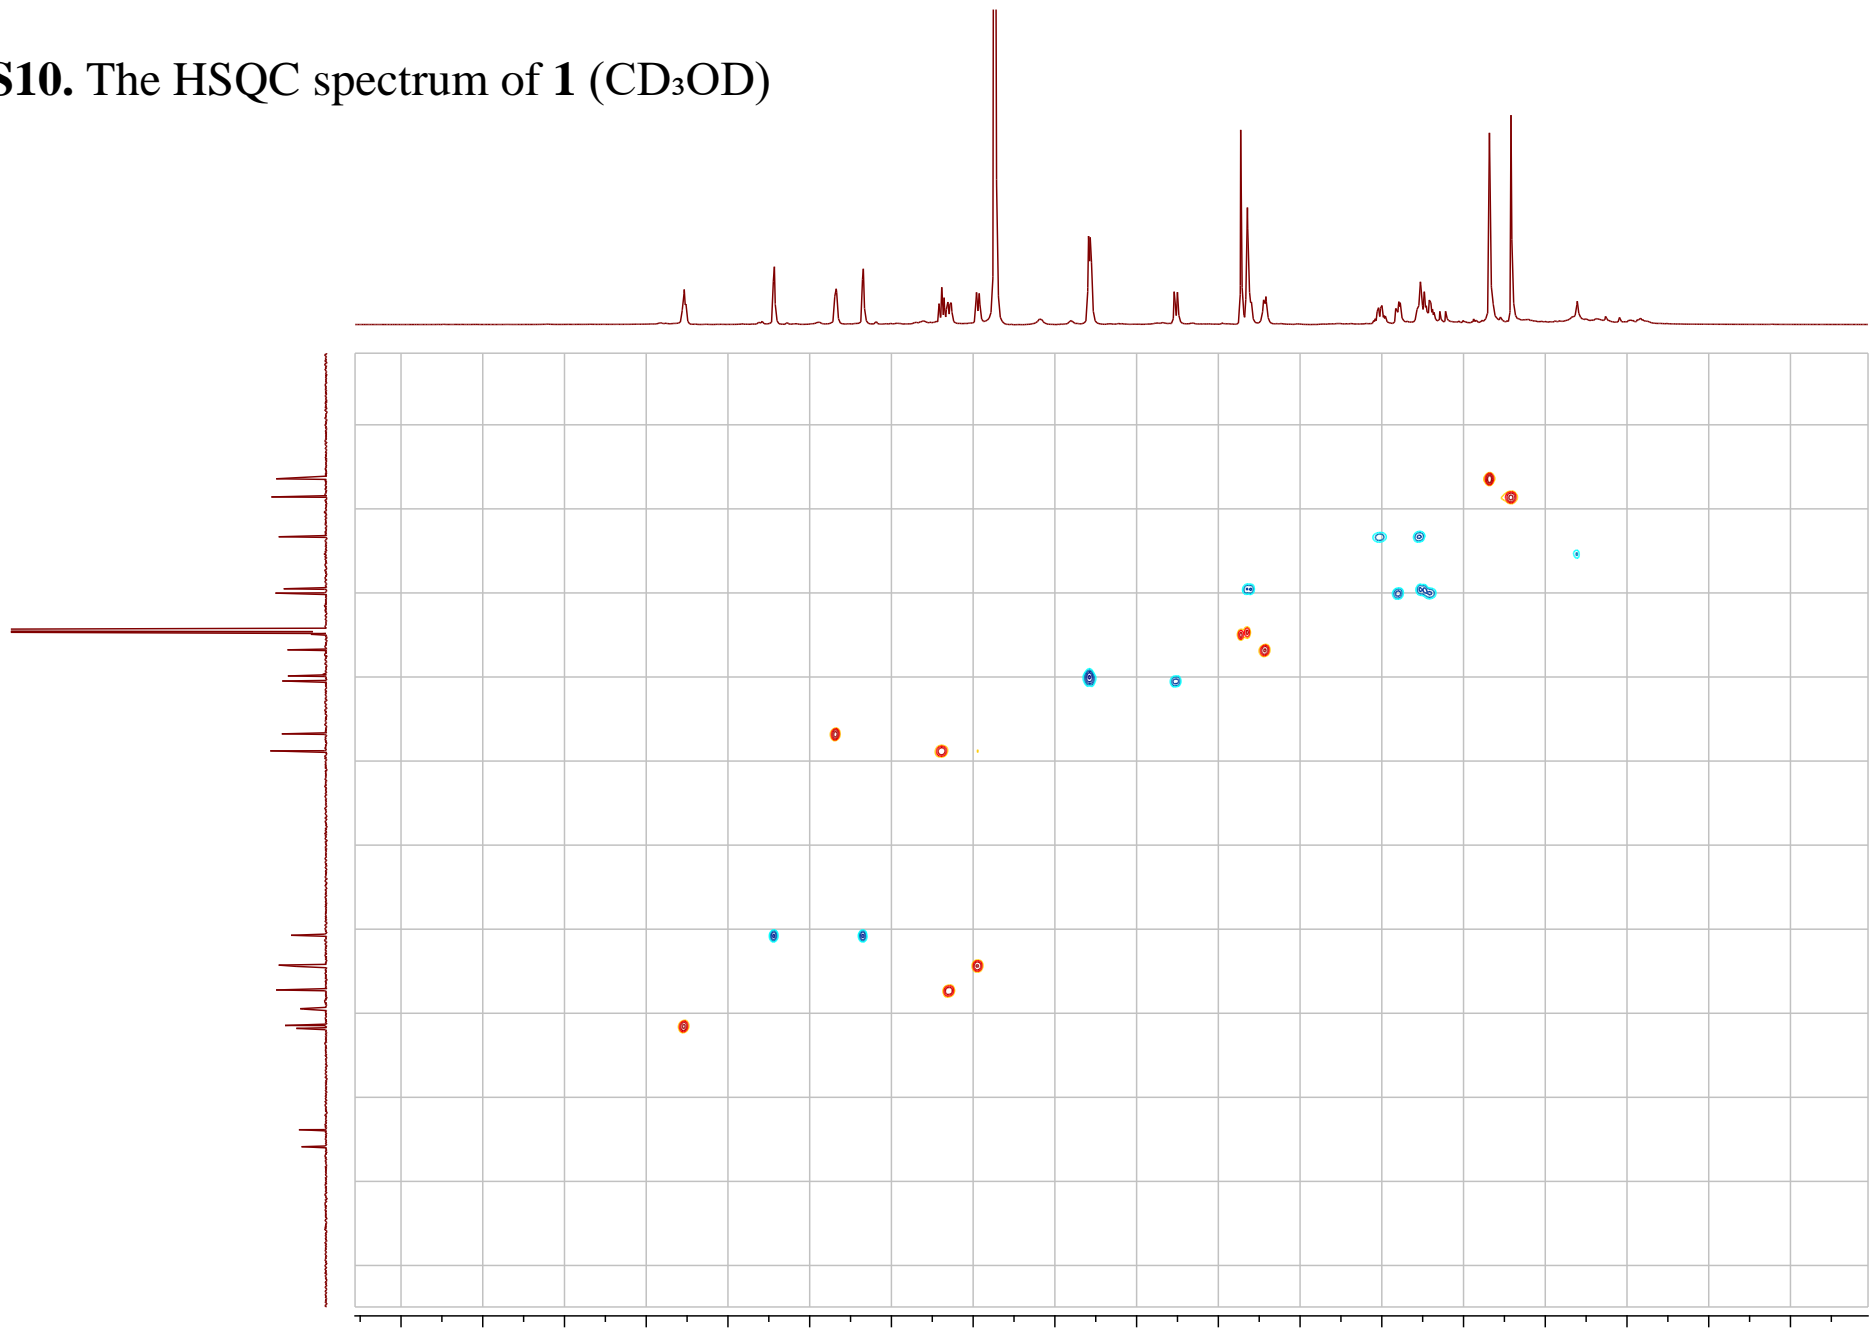

**Figure S11.** The  $^1\text{H}$ - $^1\text{H}$  COSY spectrum of **1** ( $\text{CD}_3\text{OD}$ )

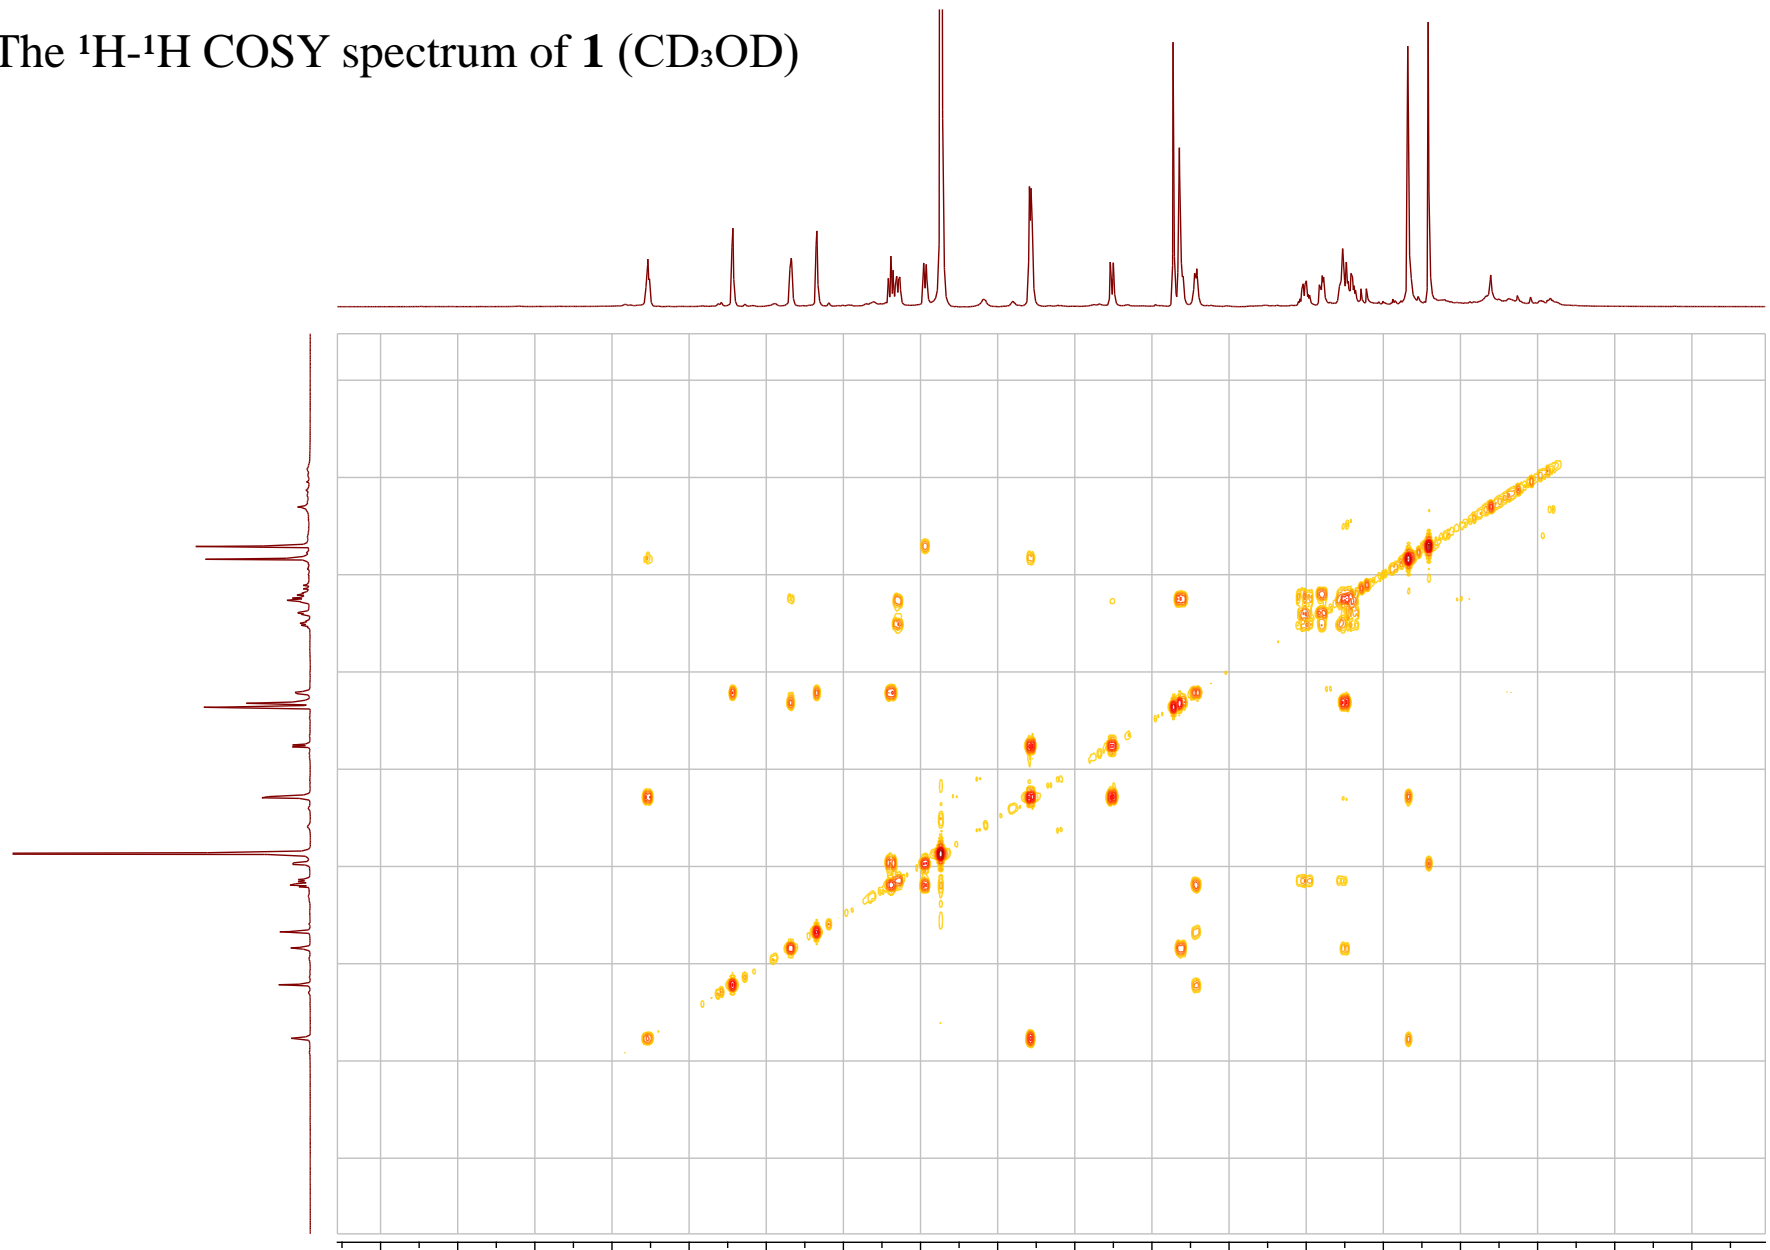

**Figure S12.** The HMBC spectrum of **1** (CD<sub>3</sub>OD)

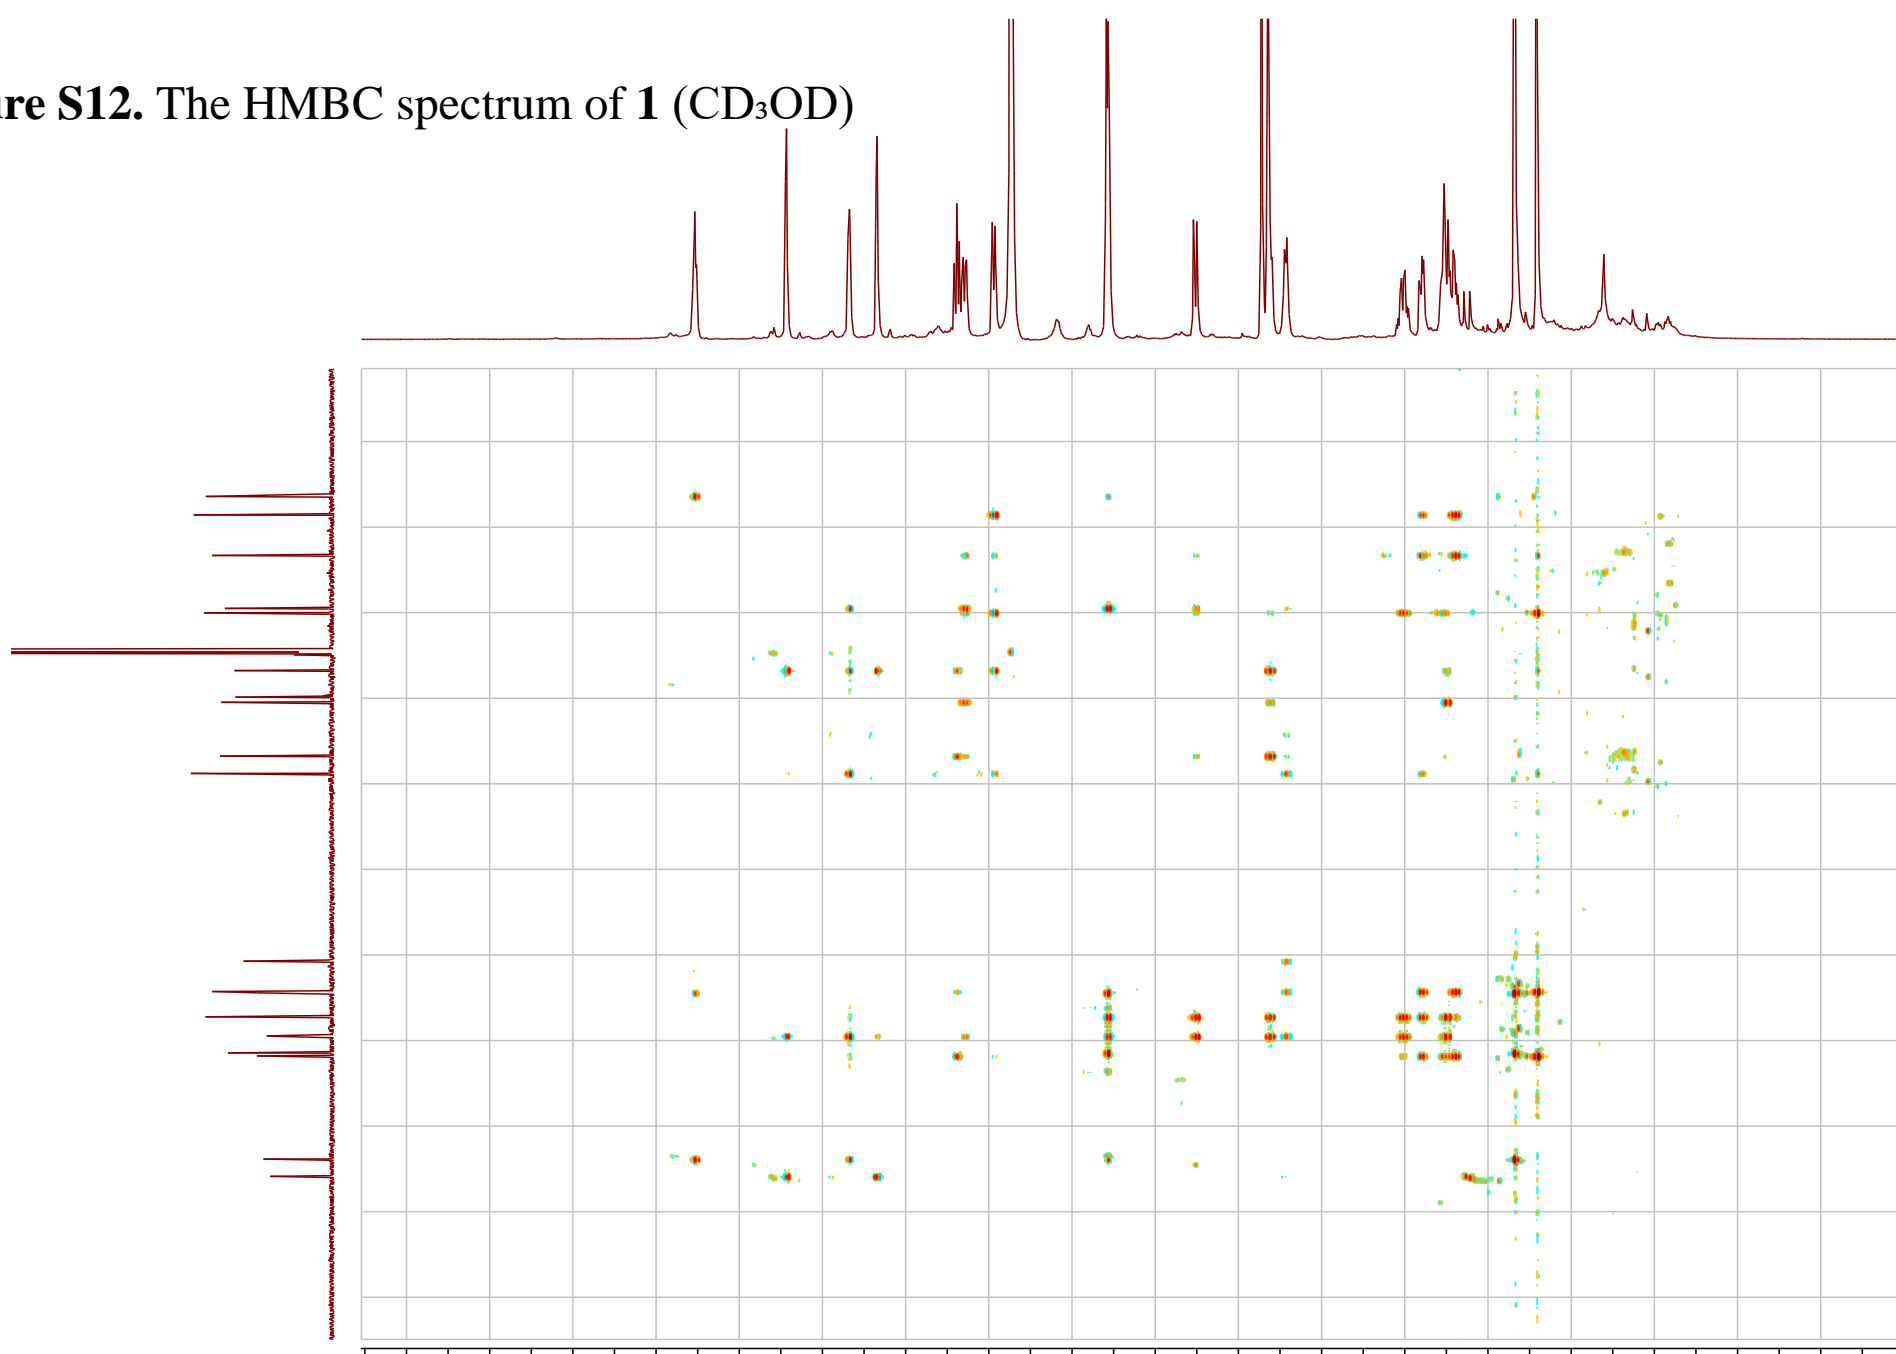

**Figure S13.** The ROESY spectrum of **1** (CD<sub>3</sub>OD)

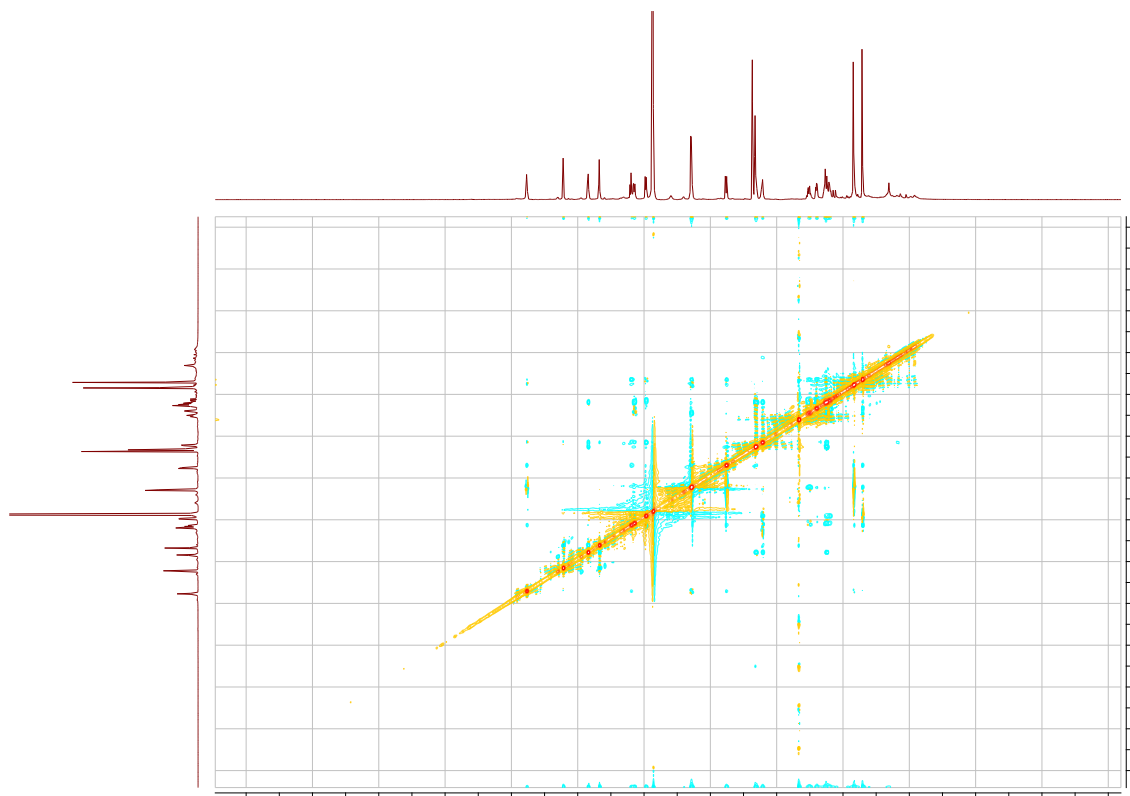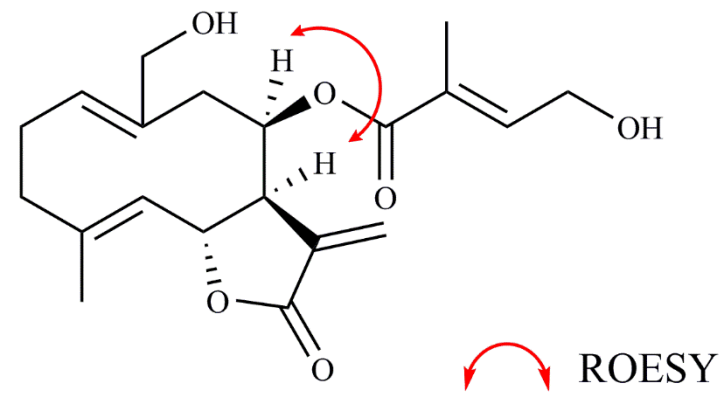



**Table S1.** Compounds from sub-fraction E2-4 predicted by SMART 2.0

| Cosine score | Name                                                                                                                         |
|--------------|------------------------------------------------------------------------------------------------------------------------------|
| 0.776        | communesin J                                                                                                                 |
| 0.774        | aplidite E                                                                                                                   |
| 0.740        | acutilobin C                                                                                                                 |
| 0.736        | aplidite G                                                                                                                   |
| 0.733        | Methyl 2-[5-Hydroxy-2-[(6E,10Z,12S)-12-Hydroxy-3,7,11,15-Tetramethyl-13-Oxohexadeca-1,6,10,14-Tetraen-3-Yl]Oxyphenyl]Acetate |
| 0.711        | Not named                                                                                                                    |
| 0.708        | Palodesangren A                                                                                                              |
| 0.706        | C29H40O6                                                                                                                     |
| 0.706        | C29H40O6                                                                                                                     |
| 0.697        | MLS001160351-01!                                                                                                             |
| 0.687        | 8'-acetoxyrietone                                                                                                            |
| 0.683        | Xanthokeistal A                                                                                                              |
| 0.682        | Methylcaribaeorane                                                                                                           |
| 0.681        | Toddacoumalone                                                                                                               |
| 0.679        | Palodesangren C                                                                                                              |

**Table S2.** Compounds from sub-fraction E2-5 predicted by SMART 2.0

| Cosine score | Name                  |
|--------------|-----------------------|
| 0.748        | aplidite G            |
| 0.741        | MLS001160351-01!      |
| 0.732        | SCHEMBL10000000       |
| 0.724        | aplidite E            |
| 0.720        | CHEMBL3314791         |
| 0.714        | apicularen A          |
| 0.710        | Lactucopicrin         |
| 0.702        | CHEMBL3314792         |
| 0.702        | gombapyrone D         |
| 0.701        | aplidite D            |
| 0.699        | Tricholomenyn E       |
| 0.697        | Tricholomenyn D       |
| 0.693        | lobatamide D          |
| 0.690        | Dihydro-lactucopicrin |
| 0.688        | eutypellazine O       |

**Table S3.** Compounds from sub-fraction E2-7 predicted by SMART 2.0

| Cosine score | Name                                                                                                                         |
|--------------|------------------------------------------------------------------------------------------------------------------------------|
| 0.747        | Genkwadaphnin                                                                                                                |
| 0.720        | Methyl 2-[5-Hydroxy-2-[(6E,10Z,12S)-12-Hydroxy-3,7,11,15-Tetramethyl-13-Oxohexadeca-1,6,10,14-Tetraen-3-Yl]Oxyphenyl]Acetate |
| 0.692        | aplidite E                                                                                                                   |
| 0.690        | Leptosin N1                                                                                                                  |
| 0.687        | 19,20-Dehydroedulirin A                                                                                                      |
| 0.680        | acutilobin C                                                                                                                 |
| 0.680        | (+)-Erythro-(7S,8R)-Delta8'-7-Acetoxy-3,4,3',5'-Tetramethoxy-8-O-4'-Neolignan                                                |
| 0.680        | NCGC00380996-01![1-(3,4-dimethoxyphenyl)-2-(2,6-dimethoxy-4-prop-2-enylphenoxy)propyl] acetate                               |
| 0.674        | C29H40O6                                                                                                                     |
| 0.674        | C29H40O6                                                                                                                     |
| 0.667        | Leptosin M1                                                                                                                  |
| 0.664        | Communesin C (identified trough in silico generated spectrum)                                                                |
| 0.661        | tulsinol E                                                                                                                   |
| 0.657        | nahocol-A                                                                                                                    |
| 0.657        | C29H42O6                                                                                                                     |

**Table S4.** Sesquiterpene lactones from sub-fraction E2-6 predicted by SMART 2.0

| Cosine score | Name                                                                                                   |
|--------------|--------------------------------------------------------------------------------------------------------|
| 0.880        | Eupaglehnin A                                                                                          |
| 0.866        | 8alpha-(Z-2-methyl-4-acetoxybut-2-enoyloxy)-15-hydroxygermacra-1(10),E,4Z,11(13)-trien-12,6alpha-olide |
| 0.851        | EUPACUNOLIN(Calcd_CDCI3)                                                                               |
| 0.838        | 15-isobutyrylmiguanin                                                                                  |
| 0.833        | Eupaglehnin B                                                                                          |
| 0.824        | vernangulide A                                                                                         |
| 0.819        | eupakirunsin B                                                                                         |
| 0.817        | 2alpha-acetoxy-15-isovalerylmiguanin                                                                   |
| 0.811        | Eupaglehnin C                                                                                          |
| 0.805        | Eupaglehnin D                                                                                          |
| 0.799        | melampolide 8                                                                                          |
| 0.799        | 9alpha,14-dihydroxy-15-isobutyryloxycostunolide                                                        |
| 0.799        | 9alpha,14-dihydroxy-15-isobutyryloxycostunolide                                                        |
| 0.796        | CHEMBL481634(Calcd_CDCI3)                                                                              |
| 0.795        | hiyodorilactone B                                                                                      |
| 0.789        | Nobilin(Calcd_CDCI3)                                                                                   |
| 0.785        | CHEMBL388763(Calcd_CDCI3)                                                                              |
| 0.784        | DEACETYLOVATIFOLIN(Calcd_CDCI3)                                                                        |
| 0.783        | eupachinilide H                                                                                        |
| 0.780        | 14-hydroxy-15-(2-methylbutyryloxy)-9-oxomelampolide                                                    |
| 0.780        | 14-hydroxy-15-(2-methylbutyryloxy)-9-oxomelampolide                                                    |
| 0.770        | Heliangin(Calcd_CDCI3)                                                                                 |
| 0.770        | EUPACHINILIDE A(Calcd_CDCI3)                                                                           |
| 0.769        | eupachinilide A                                                                                        |
